# Supplementary material for: ZnO Tips Dotted with Au Nanoparticles—Advanced SERS Determination of Trace Nicotine
Source: MDPI journal article supplement (doi:10.3390/bios11110465), 2021-11-19
Supplement: s1 [file s1]

# ZnO Tips Dotted with Au Nanoparticles—Advanced SERS Determination of Trace Nicotine

Jiaying Cao, Yan Zhai, Wanxin Tang \*, Xiaoyu Guo, Ying Wen and Haifeng Yang \*

The Education Ministry Key Lab of Resource Chemistry, College of Chemistry and Materials Science,  
Shanghai Normal University, Shanghai 200234, China;  
1000479846@smail.shnu.edu.cn (J.C.); 1000459032@smail.shnu.edu.cn (Y.Z.);  
gxy2012@shnu.edu.cn (X.G.); ying.wen@shnu.edu.cn (Y.W.)  
\* Correspondence: wanxintang@shnu.edu.cn (W.T.); hfyang@shnu.edu.cn (H.Y.)

## Calculation of the diameter of AuNPs, according to equation 1 [1]

$$d = \begin{cases} 3 + 7.5 \times 10^{-5}X^4, X \ll 23 \\ [\sqrt{X - 17} - 1]/0.06, X \gg 23 \end{cases}, X = \lambda_{\max} - 500$$

Where is the position of the surface plasmon resonance peak, d is the diameter of AuNPs.

## Calculation of enhancement factor

The EF value can be estimated using the following equation 2 [2]:

$$EF = (I_{\text{surface}}/I_{\text{solution}}) \times (N_{\text{solution}}/N_{\text{surface}}) = \frac{I_{\text{surface}}N_{\text{solution}}}{I_{\text{solution}}N_{\text{surface}}}$$

In this equation,  $I_{\text{surface}}$  stands for the signal intensities of the SERS substrate, and  $I_{\text{solution}}$  stands for the the signal intensities of the reference solution.  $N_{\text{solution}}$  and  $N_{\text{surface}}$  are the numbers of molecules probed in a reference solution and on nanomaces SERS substrates, respectively.  $I_{\text{surface}}$  and  $I_{\text{solution}}$  can be obtained from the spectra directly while  $N_{\text{solution}}$  and  $N_{\text{surface}}$  need to be calculated on the basis of the estimation of the corresponding sample area.  $N_{\text{solution}}$  and  $N_{\text{surface}}$  can be obtained according to the reported method [3].

The characteristic band at  $1363 \text{ cm}^{-1}$  was chosen for the EF estimation. The SERS signal intensities ( $I_{\text{surface}}$ ) were about 1785 for nanomace SERS substrates and the  $I_{\text{solution}}$  were about 1079 in a reference solution [3].

Suppose the molecules uniformly dispersed on the substrate and then the density of the molecules on the substrate was assumed to be  $1.0 \times 10^{-11} \text{ mol/L} \times 10 \mu\text{L} \times N_A / 0.126 \text{ cm}^2$  (the

surface area of the substrate is  $\sim 12.6 \text{ mm}^2$ ). The laser spot has a  $1 \mu\text{m}$  diameter and the surface area is about  $7.9 \times 10^{-9} \text{ cm}^2$ , so value is estimated as following:

$$N_{\text{surface}} = 1.0 \times 10^{-11} \text{ mol/L} \times 10 \times 10^{-6} \text{ L} \times N_A \times \frac{7.9 \times 10^{-9} \text{ cm}^2}{0.126 \text{ cm}^2} = 3.7$$

In comparison, Raman spectra of a  $10^{-3} \text{ M}$  R6G aqueous solution were measured applying a laser intensity of  $1.7 \text{ mW}$ . And the effective excitation volume in solution was estimated as  $\sim 400 \mu\text{m}^3$  [4] to give  $N_{\text{solution}} \sim 2.4 \times 10^8$  and a normal Raman intensity of  $\sim 4.5 \times 10^{-6}$  counts per R6G molecule.

In this way, the EF of the substrate can be obtained as high as  $1.07 \times 10^8$ .

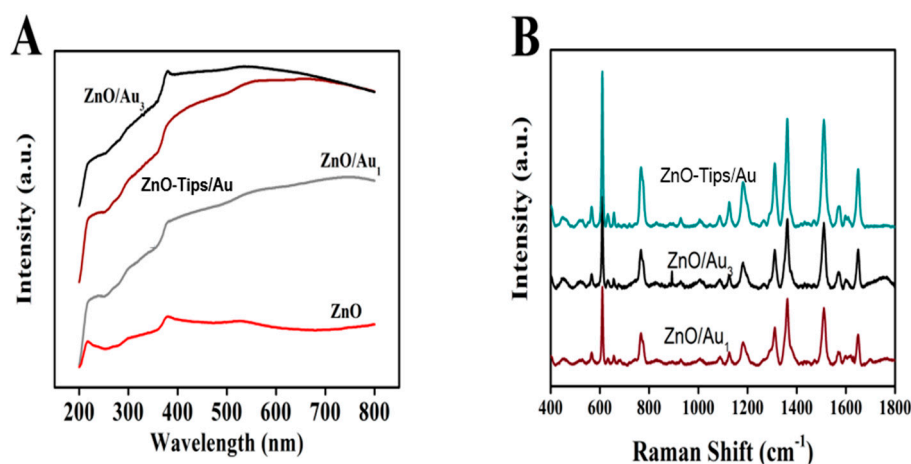

**Figure S1.** (A) UV-vis spectra of ZnO/Au substrates, prepared by adding 1, 2, and 2.5 mL of 1 % trisodium citrate solution, which denoted as ZnO/Au<sub>1</sub>, ZnO-Tips/Au and ZnO/Au<sub>3</sub>, respectively. (B) SERS spectra of R6G ( $10^{-7} \text{ mol/L}$ ) acquired on different ZnO/Au substrates.

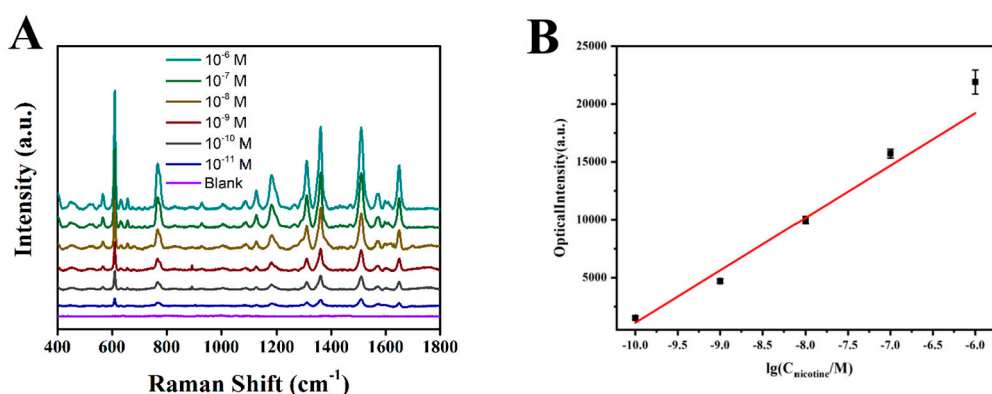

**Figure S2.** (A) SERS spectra of R6G solutions with different concentrations recorded on ZnO/Au. (B) Calibration plot based on Raman intensity at  $1363 \text{ cm}^{-1}$  for R6G based on ZnO-Tips/Au substrate.

**Table S1.** Main SERS Band Assignments of Nicotine.

| SERS/cm <sup>-1</sup> | Assignment                          |
|-----------------------|-------------------------------------|
| 679                   | Pyridine in-plane ring deformation  |
| 1031                  | Pyridine symmetric ring "breathing" |
| 1056                  | Pyridine trigonal ring "breathing"  |
| 1194                  | Pyridine in-plane C-H deformation   |
| 1589                  | Pyridine ring stretch               |

## References

1. Baptista, P.; Pereira, E.; Eaton, P.; Doria, G.; Miranda, A.; Gomes, I.; Quaresma, P.; Franco, R., Gold nanoparticles for the development of clinical diagnosis methods. *Anal Bioanal Chem* 2008, 391, 943-50.
2. Xiao, C.-h.; Xiao, B.-x.; Wang, Y.-d.; Zhang, J.; Wang, S.-m.; Wang, P.; Yang, T.-y.; Zhao, R.; Yu, H.; Li, Z.-f.; Zhang, M.-z., Synthesis of ZnO nanosheets decorated with Au nanoparticles and its application in recyclable 3D surface-enhanced Raman scattering substrates. *RSC Advances* 2015, 5, 17945-17952.
3. Huang J, Chen F, Zhang Q, et al. 3D silver nanoparticles decorated zinc oxide/silicon heterostructured nanomace arrays as high-performance surface-enhanced Raman scattering substrates[J]. *ACS applied materials & interfaces*, 2015, 7, 5725-5735.
4. Cai W B, Ren B, Li X Q, et al. Investigation of surface-enhanced Raman scattering from platinum electrodes using a confocal Raman microscope: dependence of surface roughening pretreatment[J]. *Surface Science*, 1998, 406, 9-22.
